31 **Abstract**

32 **Aims/hypothesis:** Type 1 diabetes is characterised by pancreatic islet inflammation and  
33 autoimmune-driven pancreatic beta cell destruction. Type I interferons, such as IFN $\alpha$ , are key  
34 players in early human type 1 diabetes pathogenesis, as the activation of the tyrosine kinase 2  
35 (TYK2)-signal transducer and activator of transcription (STAT) pathway induces inflammation, a  
36 long-lasting MHC class I overexpression, endoplasmic reticulum (ER) stress, and beta cell  
37 apoptosis (in synergy with IL-1 $\beta$ ). As TYK2 inhibition has been suggested as a potential  
38 therapeutic target for the prevention or treatment of type 1 diabetes, we investigated whether the  
39 selective TYK2 inhibitor deucravacitinib could protect beta cells against the damaging effects of  
40 IFN $\alpha$  and other proinflammatory cytokines (i.e. IFN $\gamma$  and IL-1 $\beta$ ).

41 **Methods:** Inflammation, ER stress, and apoptosis were evaluated by real-time PCR, immunoblot,  
42 immunofluorescence, and nuclear dyes. The promoter activity was assessed by luciferase assay  
43 and insulin secretion and content by ELISA. All experiments were performed in the human EndoC-  
44  $\beta$ H1 cell line.

45 **Results:** Pre-treatment with deucravacitinib prevented IFN $\alpha$  effects, such as STAT1 and STAT2  
46 phosphorylation and protein expression as well as MHC class I hyperexpression, in a dose-  
47 dependent manner without affecting beta cell survival and function. Comparison between  
48 deucravacitinib and two Janus kinase inhibitors, ruxolitinib and baricitinib, showed that  
49 deucravacitinib blocked IFN $\alpha$ - but not IFN $\gamma$ -induced signalling pathway. Pre-treatment with  
50 deucravacitinib protected beta cells from the pro-apoptotic and proinflammatory effects of two  
51 different combinations of cytokines: IFN $\alpha$  + IL-1 $\beta$  and IFN $\gamma$  + IL-1 $\beta$ . Moreover, this TYK2  
52 inhibitor could partially revert apoptosis and inflammation in cells previously treated with IFN $\alpha$  +  
53 IL-1 $\beta$  or IFN $\gamma$  + IL-1 $\beta$ .

54 **Conclusions/interpretation:** Our findings suggest that, by protecting beta cells against the  
55 deleterious effects of proinflammatory cytokines without affecting beta cell function and survival,  
56 deucravacitinib could be repurposed for the prevention or treatment of early type 1 diabetes.

57 **Keywords:** Apoptosis, Deucravacitinib, Inflammation, Pancreatic beta cells, TYK2, Type 1  
58 diabetes, Type I interferons

59  
60 **Abbreviations**

61 ATF3: Activating transcription factor 3

62 CHOP: C/EBP homologous protein  
63 CXCL10: C-X-C motif chemokine ligand 10  
64 ER: Endoplasmic reticulum  
65 GAS: Gamma-interferon activation site  
66 ISG: IFN-stimulated genes  
67 ISRE: IFN-stimulated regulatory element  
68 JAK: Janus kinase  
69 MX1: MX Dynamin Like GTPase 1  
70 PKR: Double-stranded RNA sensor protein kinase R  
71 Poly(I:C): Polyinosinic-polycytidylic acid  
72 STAT: Signal transducer and activator of transcription  
73 TYK2: Tyrosine kinase 2  
74 XBP1: X-box binding protein 1  
75 XBP1s: Spliced isoform of XBP1

76

## 77 **Research in context**

78 What is already known about this subject?

- 79
- In type 1 diabetes, pancreatic beta cells are killed by the immune system
  - In early insulinitis, type I interferons are crucial for the dialogue between the immune system
  - and pancreatic beta cells
  - Activation of the TYK2-STAT pathway by IFN $\alpha$  induces inflammation, HLA class I
  - overexpression, ER stress, and beta cell apoptosis.

84 What is the key question?

- 85
- Could the TYK2 inhibitor deucravacitinib prevent the deleterious effects of IFN $\alpha$  and other
  - cytokines in beta cells?

87 What are the new findings?

- 88
- Deucravacitinib prevented IFN $\alpha$  effects in a dose-dependent manner without affecting beta
  - cell function and survival
  - Pre-treatment with deucravacitinib protected beta cells against apoptosis and inflammation
  - induced by two different combinations of cytokines: IFN $\alpha$  + IL-1 $\beta$  and IFN $\gamma$  + IL-1 $\beta$
  - Addition of deucravacitinib to cells pre-treated with IFN $\alpha$  + IL-1 $\beta$  or IFN $\gamma$  + IL-1 $\beta$  partially

93           reverted apoptosis and inflammation induced by these cytokines

94   How might this impact on clinical practice in the foreseeable future?

- 95       • Due to its protective effect against proinflammatory cytokines in beta cells, our findings  
96       suggest that deucravacitinib could be repurposed for the prevention or treatment of type 1  
97       diabetes.

98

## 99 Introduction

100 Type 1 diabetes is characterised by pancreatic islet inflammation and specific destruction of  
101 pancreatic beta cells by an autoimmune assault, which develops in the context of an inadequate  
102 “dialogue” between beta cells and the invading immune cells [1, 2].

103 A growing body of evidence places type I interferons (IFNs) as key players in the early stages of  
104 human type 1 diabetes pathogenesis [3]. IFN $\alpha$  was found in islets from type 1 diabetes patients [4–  
105 6], and laser-captured islets from living donors with recent-onset type 1 diabetes showed increased  
106 expression of IFN-stimulated genes (ISGs) [7]. In genetically susceptible children, an IFN  
107 signature was temporarily amplified preceding the development of autoantibodies and throughout  
108 the progress of type 1 diabetes [8, 9]. Recently, three type I IFN response markers, namely human  
109 MX Dynamin Like GTPase 1 (MX1), double-stranded RNA sensor protein kinase R, and HLA  
110 class I, were found to be expressed in a significantly higher percentage of insulin-containing islets  
111 from autoantibody-positive and/or recent-onset type 1 diabetes donors [10]. In human beta cells,  
112 IFN $\alpha$  induces inflammation, endoplasmic reticulum (ER) stress as well as a long-lasting  
113 overexpression of HLA class I via activation of the tyrosine kinase 2 (TYK2)-signal transducer  
114 and activator of transcription (STAT) pathway. Moreover, IFN $\alpha$  induces apoptosis in the presence  
115 of IL-1 $\beta$  [11–14].

116 Targeting the type I IFN signalling pathway has been proposed as a potential adjuvant therapy to  
117 treat at-risk individuals or patients still in the very early stages of the disease [3, 15]. Among some  
118 of the strategies that have been suggested, inhibitors of Janus kinase (JAK) proteins (JAK1-3 and  
119 TYK2) show great promise. Treatment with AZD1480 (a JAK1/JAK2 inhibitor) and ABT 317 (a  
120 JAK1-selective inhibitor) protected non-obese diabetic mice against autoimmune diabetes and  
121 reversed diabetes in newly diagnosed non-diabetic mice [16, 17]. In human beta cells, clinically  
122 used JAK inhibitors, namely ruxolitinib, cerdulatinib, and baricitinib, prevented MHC class I  
123 overexpression, ER stress, chemokine production, and apoptosis [13, 14].

124 Lately, attention has been focused on *TYK2*, a candidate gene for type 1 diabetes whose genetic  
125 variants that decrease TYK2 activity are associated with protection against the disease [18–20].  
126 TYK2 is crucial for cell development and IFN $\alpha$ -mediated responses in human beta cells [11, 21,  
127 22]. Partial TYK2 knockdown protected human beta cells against apoptosis and inflammation  
128 induced by polyinosinic-polycytidilic acid (poly(I:C)), a mimic of double-stranded RNA produced  
129 during viral infection [21]. In mature stem cell-islets, TYK2 knockout or pharmacological

130 inhibition decreased T-cell-mediated cytotoxicity by preventing IFN $\alpha$ -induced antigen processing  
131 and presentation, including MHC class I expression [22]. As these findings place TYK2 as a  
132 critical regulator of the type I IFN signalling pathway in beta cells, selective TYK2 inhibition has  
133 emerged as a drug target to treat type 1 diabetes. Recently, two novel small molecule inhibitors  
134 binding to the TYK2 pseudokinase domain protected human beta cells against the deleterious  
135 effects of IFN $\alpha$  without compromising beta cell function and susceptibility to potentially  
136 diabetogenic viruses [23].

137 Deucravacitinib (BMS-986165), a small molecule that selectively targets the TYK2 pseudokinase  
138 domain, has shown great therapeutic potential for immune-mediated diseases, such as lupus  
139 nephritis and systemic lupus erythematosus [24, 25]. In fact, deucravacitinib has been recently  
140 approved for treatment of plaque psoriasis [26–28]. However, no preclinical studies have deeply  
141 explored the possible use of deucravacitinib in the context of type 1 diabetes. Notably, Chandra et  
142 al. recently used deucravacitinib to validate their CRISPR-Cas9-generated *TYK2* knockout in  
143 human induced pluripotent stem cells, but did not provide further characterisation of its effects in  
144 beta cells [22].

145 In the present study, we described the effects of deucravacitinib on the human EndoC- $\beta$ H1 beta  
146 cell line, including its ability to prevent IFN $\alpha$ -triggered signalling pathway and subsequent  
147 damaging effects on beta cells. We report that deucravacitinib prevented IFN $\alpha$  effects in a dose-  
148 dependent manner without affecting beta cell survival and function. Compared with ruxolitinib  
149 and baricitinib, deucravacitinib inhibited the IFN $\alpha$ - but not IFN $\gamma$ -stimulated signalling pathway.  
150 Interestingly, this TYK2 inhibitor protected beta cells not only against the deleterious effects of  
151 IFN $\alpha$  but also from other proinflammatory cytokines, namely IFN $\gamma$  and IL-1 $\beta$ , which suggests that  
152 deucravacitinib could be introduced as an adjuvant protective therapy at different stages of the  
153 disease to avoid the progressive loss of beta cell mass.

154

## 155 **Methods**

### 156 **Culture of EndoC- $\beta$ H1 cells**

157 The human EndoC- $\beta$ H1 beta cell line [research resource identifier (RRID): CVCL\_L909,  
158 Univercell-Biosolutions, France] was cultured in Matrigel/fibronectin-coated plates as previously  
159 described [29]. Cells were cultured in DMEM containing 5.6 mmol/l glucose, 10 mmol/l  
160 nicotinamide, 5.5  $\mu$ g/ml transferrin, 50  $\mu$ mol/l 2-mercaptoethanol, 6.7 ng/ml selenite, 2% BSA

161 fatty acid free, 100 U/ml penicillin, and 100 µg/ml streptomycin. We confirmed that cells were  
162 mycoplasma-free using the MycoAlert Mycoplasma Detection Kit (Lonza, Basel, Switzerland).

163

#### 164 **Cell treatments**

165 Proinflammatory cytokine concentrations were selected according to previously established  
166 experiments in human beta cells [11, 30]: recombinant human IFN $\alpha$  (PeproTech Inc., Rocky Hill,  
167 NJ) at 1000 U/ml; recombinant human IFN $\gamma$  (PeproTech Inc., Rocky Hill, NJ) at 1000 U/ml; and  
168 recombinant human IL-1 $\beta$  (R&D Systems, Abingdon, UK) at 50 U/ml. Cells were transfected with  
169 1 µg/ml poly(I:C) (InvivoGen, San Diego, CA) as indicated [31]. Ruxolitinib, baricitinib, or  
170 deucravacitinib (Selleckchem, Planegg, Germany) were prepared by dissolution in DMSO (used  
171 as vehicle) and cells were treated as indicated in the figures. Ruxolitinib and baricitinib  
172 concentrations were selected based on previous dose-response experiments (unpublished data).  
173 For treatments involving cytokines, 2% FBS was added to the culture medium.

174

#### 175 **Cell viability assessment**

176 The percentage of apoptosis was measured by fluorescence microscopy upon staining with the  
177 DNA-binding dyes Hoechst 33342 and propidium iodide (Sigma-Aldrich, Saint Louis, MO, USA)  
178 as described [32]. At least 600 cells were counted for each experimental condition. Viability was  
179 assessed by two independent observers, one of whom was unaware of sample identity, with an  
180 agreement between results of >90%.

181

#### 182 **Caspase 3/7 activity**

183 Caspase 3/7 activity was determined using the Caspase-Glo $\text{\textcircled{R}}$  3/7 assay (Promega, Madison, WI,  
184 USA) following the manufacturer's instructions. Briefly, upon treatment in 100 µl culture medium,  
185 cells were incubated with 100 µl Caspase-Glo $\text{\textcircled{R}}$  3/7 reagent at room temperature for 1 h before  
186 recording luminescence with a POLASTAR plate reader (BMG Labtech, Ortenberg, Germany).

187

#### 188 **C-X-C motif chemokine ligand 10 (CXCL10) measurements**

189 The release of CXCL10 to the culture medium was detected using Human ProcartaPlex  
190 immunoassays (Invitrogen, Vienna, Austria) following the manufacturer's recommendations.  
191 Reactions were read with a MagPix system (Luminex, Austin, TX, USA).

192

### 193 **Luciferase reporter assays**

194 EndoC- $\beta$ H1 cells were transfected using Lipofectamine 2000 (Invitrogen, Carlsbad, CA, USA)  
195 with pRL-CMV encoding *Renilla* luciferase (Promega) and luciferase reporter constructs for either  
196 gamma-interferon activation site (GAS) (Panomics, Fremont, CA, USA) or IFN-stimulated  
197 regulatory element (ISRE) (kindly provided by Dr Izortze Santin, University of the Basque  
198 Country, Spain). After recovery, cells were treated with either IFN $\alpha$  for 2 h or IFN $\gamma$  for 24 h [33].  
199 Luciferase activity was measured in a POLASTAR plate reader (BMG Labtech) using the Dual-  
200 Luciferase Reporter Assay System (Promega) and corrected for the luciferase activity of the  
201 internal control plasmid, i.e. pRL-CMV.

202

### 203 **RNA analysis**

204 Poly(A)<sup>+</sup> mRNA was extracted using Dynabeads mRNA DIRECT kit (Invitrogen) and cDNA  
205 synthesis was performed using the High-Capacity cDNA Reverse Transcription Kit (Applied  
206 Biosystems). Real-time PCR was performed on the CFX96 Real Time System (Bio-Rad) as  
207 described [34] and the housekeeping gene  $\beta$ -actin was used to correct expression values. All  
208 primers used here are listed in ESM Table 1.

209

### 210 **Immunoblotting and immunofluorescence analyses**

211 Western blotting analysis was performed as described [21]. Briefly, cells were washed with cold  
212 PBS and lysed in Laemmli buffer. Immunoblot was performed using antibodies against STAT1  
213 and STAT2 (phosphorylated and total forms; all at 1:1000 dilution), and  $\alpha$ -tubulin (1:5000).  
214 Peroxidase-conjugated antibodies (1:5000) were used as secondary antibodies. SuperSignal West  
215 Femto chemiluminescent substrate (Thermo Scientific, Rockford, IL, USA) and ChemiDoc XRS+  
216 (Bio-Rad Laboratories, Hercules, CA, USA) were used to detect bands.

217 Immunofluorescence was carried out as described [11, 21]. First, cells were washed with cold PBS  
218 and fixed with 4% paraformaldehyde. Afterwards, cells were permeabilised and incubated with  
219 the mouse anti-MHC Class I (W6/32) antibody (1:1000). The Alexa Fluor 568 polyclonal goat  
220 anti-mouse IgG (1:500) was used as secondary antibody. Upon staining with Hoechst 33342,  
221 coverslips were mounted with fluorescent mounting medium (Dako, Carpinteria, CA, USA) and  
222 immunofluorescence was observed with an inverted fluorescence microscope Zeiss Confocal



223 LSM900 with Airyscan 2 microscope equipped with a camera (Zeiss-Vision, Munich, Germany),  
224 and images were acquired at x40 magnification and analysed using ZEN software (version 3.3;  
225 Zeiss-Vision, Munich, Germany) and open-source FIJI software (version 2.0; <https://fiji.sc>).  
226 All antibodies used here are provided in ESM Table 2.

227

### 228 **Glucose-stimulated insulin secretion**

229 After preincubation in modified Krebs-Ringer for 1 h, cells were sequentially stimulated with low  
230 (0 mmol/l) and high glucose (20 mmol/l) for 1 h (each stimulation) as previously described [35].  
231 Insulin secreted and insulin content from lysed cells were measured using a human insulin ELISA  
232 kit (Merckodia, Uppsala, Sweden) following the manufacturer's instructions. See ESM Methods for  
233 further details.

234

### 235 **Statistical analyses**

236 The GraphPad Prism 7.0 software (GraphPad Software, La Jolla, CA, USA) was used for statistical  
237 analyses. Data are shown as mean  $\pm$  SEM of independent experiments (i.e. considering EndoC-  
238  $\beta$ H1 cells from different passages as  $n = 1$ , with individual data added to the column bars). The  
239 statistical significance of differences between groups was evaluated using one-way ANOVA  
240 followed by Dunnett's test or two-way ANOVA followed by Sidak's test or by Dunnett's test, as  
241 appropriate.

242

## 243 **Results**

### 244 **Deucravacitinib prevents IFN $\alpha$ effects in EndoC- $\beta$ H1 cells**

245 IFN $\alpha$ -mediated JAK/TYK2 activation leads to phosphorylation of STAT1 and STAT2, which will  
246 eventually upregulate several ISGs, including *STAT1/2*, *HLA-ABC*, *CXCL10*, and *MX1* (ESM Fig.  
247 1a). Pre-treatment of EndoC- $\beta$ H1 cells with deucravacitinib inhibited IFN $\alpha$ -induced STAT1 and  
248 STAT2 phosphorylation in a dose-dependent manner, where deucravacitinib showed greater  
249 potency towards IFN $\alpha$ -stimulated STAT1 inhibition (Fig. 1a,b). We then selected two doses, 10  
250 and 1000 nmol/l, for the follow-up experiments. Next, we examined the effect of deucravacitinib  
251 on the kinetics of IFN $\alpha$ -induced STAT activation. As expected, the phosphorylation of STAT1  
252 and STAT2 was markedly amplified by IFN $\alpha$  at early time points (1–4 h) and returned to baseline  
253 by 24 h (Fig. 1c,d and ESM Fig. 1b). STAT1 and STAT2 protein expression augmented in a time-

254 dependent manner. Although both proteins were already upregulated by 8 h, STAT2 reached an  
255 expression peak at 16 h, while STAT1 expression was still increasing by 24 h (Fig. 1c-f). Exposure  
256 to 1000 nmol/l deucravacitinib abrogated the IFN $\alpha$ -stimulated STAT1 and STAT2  
257 phosphorylation and protein expression, whereas 10 nmol/l deucravacitinib had only a minor effect  
258 (Fig. 1c-f and ESM Fig. 1b). These findings are better evidenced by analysing the area under the  
259 curve of the phosphorylated and total forms of STAT1 and STAT2 (ESM Fig. 1c-f). Finally, MHC  
260 class I protein expression stimulated by IFN $\alpha$  was completely blocked by 1000 nmol/l  
261 deucravacitinib (Fig. 1g,h).

262

### 263 **Beta cell survival and function are not affected by deucravacitinib**

264 We examined whether deucravacitinib would interfere with beta cell survival and function in the  
265 absence or presence of IFN $\alpha$ . After 24 h exposure, 1000 nmol/l deucravacitinib did not affect beta  
266 cell viability (ESM Fig. 2a) nor change glucose-stimulated insulin secretion and insulin content  
267 (ESM Fig. 2b,c). IFN $\alpha$  did not affect beta cell viability and function as described [11, 23].

268

### 269 **IFN $\alpha$ , but not IFN $\gamma$ signalling pathway is blocked by deucravacitinib**

270 We compared deucravacitinib with ruxolitinib and baricitinib, two JAK1/JAK2 inhibitors  
271 previously tested in beta cells [13, 14, 36]. First, we measured STAT1 and STAT2 phosphorylation  
272 upon stimulation with IFN $\alpha$  or IFN $\gamma$  (Fig. 2a-d and ESM Fig. 3a,b). Ruxolitinib, baricitinib, and  
273 deucravacitinib prevented IFN $\alpha$ -stimulated increase in P-STAT1 and P-STAT2 levels (Fig. 2a,c  
274 and ESM Fig. 3b). Nevertheless, deucravacitinib did not change IFN $\gamma$ -induced STAT1  
275 phosphorylation, whereas ruxolitinib and baricitinib blocked it (Fig. 2b,d). Of note, IFN $\gamma$  did not  
276 induce STAT2 phosphorylation (Fig. 2b) [33]. Next, we assessed ISRE and GAS activities upon  
277 stimulation with IFN $\alpha$  and IFN $\gamma$  (Fig. 2e,f and ESM Fig. 3c,d). All three inhibitors abrogated  
278 IFN $\alpha$ -stimulated ISRE reporter activity (Fig. 2e), whereas IFN $\gamma$ -induced GAS activation was  
279 barely affected by deucravacitinib (Fig. 2f). As expected, ISRE and GAS activities were not  
280 stimulated by, respectively, IFN $\gamma$  and IFN $\alpha$  (ESM Fig. 3c,d). These findings corroborate the  
281 deucravacitinib mode of action, which specifically binds to and inhibits TYK2 without affecting  
282 JAK1/JAK2 pathways. As TYK2 does not participate in the IFN $\gamma$  pathway, the lack of  
283 deucravacitinib effect in IFN $\gamma$ -stimulated changes is expected.

284

## 285 **Deucravacitinib blocks IFN $\alpha$ -induced upregulation of ISGs, but not ER stress markers**

286 We assessed the effects of these three inhibitors on the expression of some ISGs and ER stress  
287 markers. All three inhibitors prevented IFN $\alpha$ -induced upregulation of *HLA-ABC*, *CXCL10*, and  
288 *MXI* in a dose-dependent manner (Fig. 3a-c). Although ruxolitinib and baricitinib inhibited the  
289 expression of the ER stress markers C/EBP homologous protein (*CHOP*, also known as *DDIT3*)  
290 and spliced isoform of XBP1 X-box binding protein 1 (*XBPIs*), only the lower dose of  
291 deucravacitinib reduced CHOP expression (Fig. 3d,e). None of the three inhibitors changed the  
292 mRNA expression of activating transcription factor 3 (*ATF3*) (Fig. 3f).

293

## 294 **Deucravacitinib prevents IFN $\alpha$ + IL-1 $\beta$ -induced effects in beta cells**

295 Previous studies showed that a combination of IFN $\alpha$  + IL-1 $\beta$ , two cytokines that might be present  
296 in the islet milieu at early stages of insulinitis, induces beta cell apoptosis, inflammation, and ER  
297 stress [11, 14, 23] (Fig. 4a). Then, we investigated whether deucravacitinib protects beta cells after  
298 IFN $\alpha$  + IL-1 $\beta$  exposure for 24 h. We observed that deucravacitinib completely prevented IFN $\alpha$  +  
299 IL-1 $\beta$ -induced apoptosis, which was assessed by two approaches, namely DNA-binding dyes and  
300 caspase 3/7 activity assay (Fig. 4b,c). Moreover, cells treated with deucravacitinib showed reduced  
301 levels of P-STAT1 and STAT1 (Fig. 4d-f) as well as *HLA-ABC*, *MXI*, *CXCL10*, and *CHOP* mRNA  
302 expression (Fig. 4g-j). MHC class I protein expression and CXCL10 secretion to the medium were  
303 also decreased by TYK2 inhibition (Fig. 4k-m).

304

## 305 **Deucravacitinib abrogates IFN $\gamma$ + IL-1 $\beta$ -induced apoptosis in beta cells**

306 We then evaluated whether deucravacitinib would protect against cytokines that, as compared with  
307 IFN $\alpha$ , probably appear later in the progression of islet inflammation, such as IFN $\gamma$  and IL-1 $\beta$  [1,  
308 37] (Fig. 5a). After treatment for 24 h, deucravacitinib inhibited IFN $\gamma$  + IL-1 $\beta$ -induced apoptosis  
309 in a dose-dependent manner (60% and 92% protection at 10 and 1000 nmol/l, respectively) (Fig.  
310 5b). These results were confirmed by the caspase 3/7 activity assay (Fig. 5c). Pre-treatment with  
311 deucravacitinib did not block IFN $\gamma$  + IL-1 $\beta$ -induced STAT1 phosphorylation and protein  
312 expression (Fig. 5d-f) or *HLA-ABC* mRNA expression (Fig. 5g). In fact, P-STAT1 levels were  
313 higher in cells treated with 1000 nmol/l deucravacitinib than in vehicle-treated cells (Fig. 5d,e).  
314 Conversely, deucravacitinib diminished *MXI* and *CXCL10* mRNA expression, whereas *CHOP*  
315 was reduced at the lower dose of deucravacitinib (Fig. 5h-j).

316

### 317 **Poly(I:C)-induced apoptosis is not changed by TYK2 inhibition**

318 As intracellular exposure to poly(I:C), a mimic of viral infection, results in the production and  
319 secretion of type I IFNs as well as beta cell apoptosis [21, 38, 39], we tested deucravacitinib after  
320 treatment with poly(I:C) for 24 h. Contrary to what we observed for cytokine-triggered cell death  
321 (Figs 4 and 5), apoptosis induced by poly(I:C) was not altered by deucravacitinib (ESM Fig. 4a).  
322 Curiously, despite the absence of an effect on viability, deucravacitinib inhibited poly(I:C)-  
323 stimulated *HLA-ABC*, *MX1*, and *CHOP* upregulation (ESM Fig. 4b-d). While *CXCL10* mRNA  
324 expression was dampened by TYK2 inhibition, *CXCL10* protein secretion was not significantly  
325 reduced (ESM Fig. 4e,f).

326

### 327 **The harmful effects of cytokines are partially reverted by deucravacitinib**

328 Up to this point, we investigated whether pre-treatment with deucravacitinib would prevent the  
329 effects of different cytokines in beta cells. Here, we assessed if deucravacitinib could reverse these  
330 damaging effects. EndoC- $\beta$ H1 cells were pre-treated with either IFN $\alpha$  + IL-1 $\beta$  or IFN $\gamma$  + IL-1 $\beta$   
331 for 24 h. Afterwards, 1000 nmol/l deucravacitinib was added for an additional 24 h still in the  
332 presence of the different mixes of cytokines (Figs 6a and 7a). IFN $\alpha$  + IL-1 $\beta$ -induced apoptosis was  
333 partially reversed by deucravacitinib (60% decrease) (Fig. 6b). The expression of *HLA-ABC*  
334 mRNA stimulated by IFN $\alpha$  + IL-1 $\beta$  remained unchanged in the presence of deucravacitinib (Fig.  
335 6c), which agrees with previous data showing a long-lasting expression of *HLA-ABC* [13]. STAT1  
336 protein levels and *CXCL10* secretion as well as *CHOP* mRNA expression were reduced by 26%-  
337 42%, while the expression of *MX1* and *CXCL10* was completely inhibited by deucravacitinib (Fig.  
338 6 d-i). Of note, STAT1 phosphorylation was not detected, probably due to a process of  
339 desensitisation following the initial IFN $\alpha$  stimulus [33] (Fig. 6c).

340 Similarly to IFN $\alpha$  + IL-1 $\beta$  (Fig. 6), deucravacitinib diminished IFN $\gamma$  + IL-1 $\beta$ -induced apoptosis  
341 (64% decrease) but did not modify *HLA-ABC* mRNA expression (Fig. 7b,c). Protein levels of  
342 STAT1 and *CXCL10*, however, were not altered by the TYK2 inhibitor, whereas a slight, non-  
343 significant 30% reduction was seen in *CHOP* expression (Fig. 7d,e,g,i). Expression of *MX1* and  
344 *CXCL10* was only partially blocked by deucravacitinib under IFN $\gamma$  + IL-1 $\beta$  conditions (Fig. 7f,h).

345

### 346 **Discussion**

347 Due to its implication in type 1 diabetes pathogenesis, IFN $\alpha$  pathway has arisen as an interesting  
348 therapeutic target. Reduction of IFN $\alpha$  extracellular levels, blockade of IFN $\alpha$  itself and/or its  
349 receptor, and reduction of the activity of proteins mediating IFN effects have been proposed as  
350 means to diminish IFN $\alpha$  deleterious effects [40]. In rodent models, some of these strategies have  
351 successfully prevented diabetes development [16, 17, 41–43].

352 One of the most promising therapeutic approaches for type 1 diabetes prevention/early treatment  
353 is the targeting of the JAK-STAT pathway with JAK inhibitors [3, 15]. This strategy has been  
354 clinically approved for the treatment of some autoimmune diseases, including systemic lupus  
355 erythematosus [44], rheumatoid arthritis [45], and psoriasis [26, 27]. Although there are no  
356 approved JAK inhibitors being clinically used for type 1 diabetes, recent preclinical data suggest  
357 that these inhibitors could be repurposed to treat this disease [13, 14, 16, 17, 22, 23]. In fact, a  
358 clinical trial aiming to determine whether baricitinib could slow the progressive, immune-  
359 mediated loss of beta cell function and mass that occurs in type 1 diabetes is currently ongoing  
360 [46].

361 In the current study, we tested whether the TYK2 inhibitor deucravacitinib could protect human  
362 beta cells against the deleterious effects of IFN $\alpha$  and other cytokines. We chose to focus on this  
363 TYK2 inhibitor for two main reasons: first, due to the importance of TYK2 to type 1 diabetes  
364 pathogenesis. For instance, TYK2 regulates pro-apoptotic and proinflammatory pathways via  
365 regulation of the IFN $\alpha$  signalling, antigen processing and presentation, and modulation of cytokine  
366 and chemokine production in beta cells [21, 22]. Second, exploring a drug that has been recently  
367 approved by the US Food and Drug Administration to treat another autoimmune disease, namely  
368 plaque psoriasis [28], increases its repositioning potential for type 1 diabetes and facilitates the  
369 bench-to-bedside transition.

370 Deucravacitinib is a small-molecule ligand that binds to and stabilizes the TYK2 pseudokinase  
371 domain, leading to highly potent and selective allosteric TYK2 inhibition [24, 47]. Inhibition of  
372 IFN $\alpha$ -induced STAT phosphorylation by deucravacitinib has been shown in several cell types,  
373 such as CD3<sup>+</sup> T cells, CD19<sup>+</sup> B cells, and CD14<sup>+</sup> monocytes [24]. Here we showed that  
374 deucravacitinib also prevents IFN $\alpha$ -stimulated STAT1 and STAT2 phosphorylation in human  
375 EndoC- $\beta$ H1 cell line. Furthermore, in agreement with previous findings [24], deucravacitinib also  
376 showed higher potency against TYK2-mediated phosphorylation of STAT1 compared with  
377 STAT2 phosphorylation in our experimental model. Notably, at the concentrations used in our

378 study, deucravacitinib did not affect beta cell function and viability, which is a desired feature for  
379 a drug with therapeutic potential.

380 Compared with ruxolitinib and baricitinib, two clinically available JAK1/JAK2 inhibitors,  
381 deucravacitinib was more potent against IFN $\alpha$ -stimulated STAT phosphorylation, ISRE activity,  
382 and mRNA expression of *HLA-ABC*, *MX1*, and *CXCL10*. However, unlike ruxolitinib and  
383 baricitinib, deucravacitinib did not block the IFN $\alpha$ -mediated upregulation of the ER stress markers  
384 *CHOP* and *XBPIs*. Our results partially agree with the ones reported by Coomans de Brachène et  
385 al., where two TYK2 inhibitors failed to prevent IFN $\alpha$ -induced *CHOP* expression in EndoC- $\beta$ H1  
386 cells but inhibited *CHOP* and *ATF3* expression in dispersed human islets [23].

387 Prior studies have shown that other JAK/TYK2 inhibitors could prevent the detrimental effects of  
388 IFN $\alpha$  + IL-1 $\beta$ , such as apoptosis and inflammation [14, 23]. Therefore, we proceeded to  
389 investigate whether deucravacitinib could protect beta cells against the harmful effects of two  
390 different combinations of cytokines: IFN $\alpha$  + IL-1 $\beta$  (early insulinitis) and IFN $\gamma$  + IL-1 $\beta$  (late  
391 insulinitis). In both scenarios, pre-treatment with deucravacitinib not only protected against  
392 cytokine-induced apoptosis but prevented the upregulation of *HLA-ABC*, *MX1*, *CXCL10*, and  
393 *CHOP*. Additionally, in cells treated with IFN $\alpha$  + IL-1 $\beta$ , deucravacitinib blocked the  
394 overexpression of MHC class I at the cell surface and *CXCL10* secretion to the medium.  
395 Importantly, the addition of deucravacitinib when cytokine exposure was already ongoing could  
396 reverse, at least in part, the deleterious effects of these cytokines. Although it seems clear that  
397 deucravacitinib confers protection against IFN $\alpha$  + IL-1 $\beta$  by directly inhibiting the TYK2-mediated  
398 pathway, it remains to be answered how deucravacitinib protects against IFN $\gamma$  + IL-1 $\beta$ -induced  
399 effects. Indeed, our present data suggest that deucravacitinib does not interfere with the IFN $\gamma$ -  
400 mediated signalling pathway.

401 Due to TYK2 role in the IFN $\alpha$ -mediated antiviral response, as evidenced by the regulation of *MX1*  
402 mRNA expression and STAT1 protein levels [11, 22, 23], another desired characteristic for a  
403 TYK2 inhibitor would be to block IFN $\alpha$  pathway without sensitising beta cells to viral infections.  
404 To test this hypothesis, we mimicked a viral infection by exposing EndoC- $\beta$ H1 cells to poly(I:C).  
405 In our model, deucravacitinib abrogated poly(I:C)-stimulated inflammation but did not change  
406 poly(I:C)-induced beta cell apoptosis. Even though our results were obtained with a synthetic viral  
407 double-stranded RNA analogue, they conform to a previous study showing that two novel TYK2  
408 inhibitors did not sensitize human beta cells to potentially diabetogenic coxsackieviruses CVB1

409 and CVB5 [23]. Importantly, deucravacitinib and these two TYK2 inhibitors share the same  
410 mechanism of action, i.e. binding to the TYK2 pseudokinase domain.

411 Based on our findings, it will be interesting to test whether novel small molecule TYK2  
412 pseudokinase ligands [48] could also protect beta cells from IFN $\alpha$  deleterious effects.  
413 Nevertheless, we must bear in mind that completely inhibiting TYK2 may be counterproductive,  
414 as it might lead to susceptibility to microorganisms (e.g. mycobacteria and virus) and  
415 immunodeficiency [49]. Thus, regardless of the TYK2 inhibitor chosen, we should focus on doses  
416 that induce a partial inhibition, as seen in individuals with a protective single nucleotide  
417 polymorphism in the *TYK2* gene [18], as it could offer maximal efficacy with reduced risk of  
418 developing secondary infections.

419 One potential limitation of our study is its purely in vitro nature, which may limit our conclusions  
420 regarding the use of deucravacitinib to treat a disease as complex as type 1 diabetes. Conversely,  
421 our findings, along with those reported by Coomans de Brachène et al. [23] and Chandra et al.  
422 [22], provide further preclinical evidence that TYK2 inhibitors could be considered a strategy for  
423 an early therapy for type 1 diabetes. The next logical step would be to investigate whether our in  
424 vitro findings could be translated to animal models of type 1 diabetes (e.g. NOD and RIP-B7.1  
425 mice).

426 In conclusion, we have provided evidence that deucravacitinib protects beta cells against the  
427 deleterious effects of proinflammatory cytokines, such as IFN $\alpha$ , IFN $\gamma$  and IL-1 $\beta$ , without affecting  
428 beta cell function and survival. Our present findings add to the growing body of evidence showing  
429 that TYK2 inhibition may be an efficient strategy to treat type 1 diabetes. Moreover, we suggest  
430 that deucravacitinib could be repurposed to treat pre-symptomatic type 1 diabetes subjects (i.e.  
431 positive for 2–3 autoantibodies but still normoglycemic) or be introduced in the early stages of  
432 type 1 diabetes onset.

433

#### 434 **Acknowledgements**

435 The authors are grateful to Beatriz Bonmati Botella, Maria Luisa Navarro, and Salomé Ramon for  
436 their excellent technical support. Once again, we thank Dr. Izortze Santin, University of the Basque  
437 Country, Spain, for providing the luciferase reporter construct for ISRE. Figures 4a, 5a, 6a, 7a,  
438 ESM Fig. 1a, and ESM Fig. 3a were created with BioRender.com.

439

#### 440 **Data availability**

441 All data generated or analysed during this study are included in this published article (and its  
442 supplementary information files). Data are however available from the corresponding authors upon  
443 reasonable request.

444

#### 445 **Funding**

446 LM is funded by the grant PID2020-117569RA-I00 by MCIN/AEI/10.13039/501100011033 and  
447 by the grant SEJI/2018/023 by Generalitat Valenciana. AN is supported by European Union's  
448 Horizon 2020 research and innovation programme under grant agreement GOLIATH No. 825489,  
449 by the grant PID2020-117294RB-I00 by MCIN/AEI/10.13039/501100011033, and by the grant  
450 PROMETEO II/2020/006 by Generalitat Valenciana. This research was supported by CIBER-  
451 Consorcio Centro de Investigación Biomédica en Red (CB07/08/0002), Instituto de Salud Carlos  
452 III, Ministerio de Ciencia e Innovación.

453

#### 454 **Authors' relationships and activities**

455 The authors declare that there are no relationships or activities that might bias, or be perceived to  
456 bias, their work.

457

#### 458 **Contribution statement**

459 RSDS and LM: Conceptualization, Supervision, Visualization, Investigation, Formal analysis, and  
460 Writing – original draft & editing; DGL and AAP-S: Investigation, Formal analysis, and Writing  
461 – review & editing; AN: Resources and Writing – review & editing; LM: Resources, Funding  
462 acquisition, and Project administration. All authors have read and given approval to the final  
463 version of the manuscript. RSDS and LM are guarantors of this work and, as such, had full access  
464 to all the data presented herein and take responsibility for the integrity of the data and the accuracy  
465 of data analyses.

466

#### 467 **References**

- 468 1. Eizirik DL, Pasquali L, Cnop M (2020) Pancreatic  $\beta$ -cells in type 1 and type 2 diabetes  
469 mellitus: different pathways to failure. *Nat Rev Endocrinol* 26(7):349–362.  
470 <https://doi.org/10.1038/s41574-020-0355-7>
- 471 2. Mallone R, Eizirik DL (2020) Presumption of innocence for beta cells: why are they  
472 vulnerable autoimmune targets in type 1 diabetes? *Diabetologia* 63(10):1999–2006.



- 473 <https://doi.org/10.1007/s00125-020-05176-7>
- 474 3. Marroqui L, Perez-Serna AA, Babiloni-Chust I, Dos Santos RS (2021) Type I interferons  
475 as key players in pancreatic  $\beta$ -cell dysfunction in type 1 diabetes. *Int Rev Cell Mol Biol* 359:1–80.  
476 <https://doi.org/10.1016/bs.ircmb.2021.02.011>
- 477 4. Foulis A, Farquharson M, Meager A (1987) Immunoreactive alpha-interferon in insulin-  
478 secreting beta cells in type 1 diabetes mellitus. *The Lancet* 2(8573):1423–1427.  
479 [https://doi.org/10.1016/S0140-6736\(87\)91128-7](https://doi.org/10.1016/S0140-6736(87)91128-7)
- 480 5. Somoza N, Vargas F, Roura-Mir C, et al (1994) Pancreas in recent onset insulin-dependent  
481 diabetes mellitus: Changes in HLA, adhesion molecules and autoantigens, restricted T cell receptor  
482  $V\beta$  usage, and cytokine profile. *J Immunol* 153(3):1360–1377
- 483 6. Huang X, Yuan J, Goddard A, et al (1995) Interferon expression in the pancreases of  
484 patients with type I diabetes. *Diabetes* 44(6):658–664. <https://doi.org/10.2337/diab.44.6.658>
- 485 7. Lundberg M, Krogvold L, Kuric E, Dahl-Jørgensen K, Skog O (2016) Expression of  
486 interferon-stimulated genes in insulinitic pancreatic islets of patients recently diagnosed with type 1  
487 diabetes. *Diabetes* 65(10):3104–3110. <https://doi.org/10.2337/db16-0616>
- 488 8. Ferreira RC, Guo H, Coulson RMR, et al (2014) A type I Interferon transcriptional  
489 signature precedes autoimmunity in children genetically at risk for type 1 diabetes. *Diabetes*  
490 63(7):2538–2550. <https://doi.org/10.2337/db13-1777>
- 491 9. Kallionpaa H, Elo LL, Laajala E, et al (2014) Innate Immune Activity Is Detected Prior to  
492 Seroconversion in Children With HLA-Conferred Type 1 Diabetes Susceptibility. *Diabetes*  
493 63(7):2402–2414. <https://doi.org/10.2337/db13-1775>
- 494 10. Apaolaza PS, Balcacean D, Zapardiel-Gonzalo J, et al (2021) Islet expression of type I  
495 interferon response sensors is associated with immune infiltration and viral infection in type 1  
496 diabetes. *Sci Adv* 7(9):eabd6527. <https://doi.org/10.1126/sciadv.abd6527>
- 497 11. Marroqui L, Dos Santos RS, Op de beeck A, et al (2017) Interferon- $\alpha$  mediates human beta  
498 cell HLA class I overexpression, endoplasmic reticulum stress and apoptosis, three hallmarks of  
499 early human type 1 diabetes. *Diabetologia* 60(4):656–667. <https://doi.org/10.1007/s00125-016-4201-3>
- 500
- 501 12. Lombardi A, Tomer Y (2017) Interferon alpha impairs insulin production in human beta  
502 cells via endoplasmic reticulum stress. *J Autoimmun* 80:48–55.  
503 <https://doi.org/10.1016/j.jaut.2017.02.002>
- 504 13. Coomans de Brachène A, Dos Santos RS, Marroqui L, et al (2018) IFN- $\alpha$  induces a  
505 preferential long-lasting expression of MHC class I in human pancreatic beta cells. *Diabetologia*  
506 61(3):636–640. <https://doi.org/10.1007/s00125-017-4536-4>
- 507 14. Colli ML, Ramos-Rodríguez M, Nakayasu ES, et al (2020) An integrated multi-omics  
508 approach identifies the landscape of interferon- $\alpha$ -mediated responses of human pancreatic beta  
509 cells. *Nat Commun* 11(1):2584. <https://doi.org/10.1038/s41467-020-16327-0>
- 510 15. Eizirik DL, Szymczak F, Alvelos MI, Martin F (2021) From Pancreatic  $\beta$ -Cell Gene  
511 Networks to Novel Therapies for Type 1 Diabetes. *Diabetes* 70(9):1915–1925.  
512 <https://doi.org/10.2337/dbi20-0046>
- 513 16. Trivedi PM, Graham KL, Scott NA, et al (2017) Repurposed JAK1/JAK2 inhibitor reverses  
514 established autoimmune insulinitis in NOD mice. *Diabetes* 66(6):1650–1660.  
515 <https://doi.org/10.2337/db16-1250>
- 516 17. Ge T, Jhala G, Fynch S, et al (2020) The JAK1 Selective Inhibitor ABT 317 Blocks  
517 Signaling Through Interferon- $\gamma$  and Common  $\gamma$  Chain Cytokine Receptors to Reverse  
518 Autoimmune Diabetes in NOD Mice. *Front Immunol* 11:588543.

- 519 <https://doi.org/10.3389/fimmu.2020.588543>
- 520 18. Dendrou CA, Cortes A, Shipman L, et al (2016) Resolving TYK2 locus genotype-To-  
521 phenotype differences in autoimmunity. *Sci Transl Med* 8(363):363ra149.  
522 <https://doi.org/10.1126/scitranslmed.aag1974>
- 523 19. Tao JH, Zou YF, Feng XL, et al (2011) Meta-analysis of TYK2 gene polymorphisms  
524 association with susceptibility to autoimmune and inflammatory diseases. *Mol Biol Rep*  
525 38(7):4663–4672. <https://doi.org/10.1007/s11033-010-0601-5>
- 526 20. Wallace C, Smyth DJ, Maisuria-Armer M, Walker NM, Todd JA, Clayton DG (2010) The  
527 imprinted DLK1-MEG3 gene region on chromosome 14q32.2 alters susceptibility to type 1  
528 diabetes. *Nat Genet* 42(1):68–71. <https://doi.org/10.1038/ng.493>
- 529 21. Marroqui L, Dos Santos RS, Fløyel T, et al (2015) TYK2, a candidate gene for type 1  
530 diabetes, modulates apoptosis and the innate immune response in human pancreatic  $\beta$ -cells.  
531 *Diabetes* 64(11):3808–3817. <https://doi.org/10.2337/db15-0362>
- 532 22. Chandra V, Ibrahim H, Halliez C, et al (2022) The type 1 diabetes gene TYK2 regulates  $\beta$ -  
533 cell development and its responses to interferon- $\alpha$ . *Nat Commun* 13(1):6363.  
534 <https://doi.org/10.1038/s41467-022-34069-z>
- 535 23. Coomans de Brachène A, Castela A, Op de Beeck A, et al (2020) Pre-clinical evaluation  
536 of TYK2 inhibitors for human beta cell protection in type 1 diabetes. *Diabetes Obes Metab*  
537 22(10):1827–1836. <https://doi.org/10.1111/dom.14104>
- 538 24. Burke JR, Cheng L, Gillooly KM, et al (2019) Autoimmune pathways in mice and humans  
539 are blocked by pharmacological stabilization of the TYK2 pseudokinase domain. *Sci Transl Med*  
540 11(502):eaaw1736. <https://doi.org/10.1126/scitranslmed.aaw1736>
- 541 25. Morand E, Pike M, Merrill JT, et al Deucravacitinib, a Tyrosine Kinase 2 Inhibitor, in  
542 Systemic Lupus Erythematosus: A Phase II, Randomized, Double-Blind, Placebo-Controlled  
543 Trial. *Arthritis Rheumatol* n/a(n/a). <https://doi.org/10.1002/art.42391>
- 544 26. Armstrong AW, Gooderham M, Warren RB, et al (2022) Deucravacitinib versus placebo  
545 and apremilast in moderate to severe plaque psoriasis: efficacy and safety results from the 52-  
546 week, randomized, double-blinded, placebo-controlled phase 3 POETYK PSO-1 trial. *J Am Acad*  
547 *Dermatol* 88(1):P29-39. <https://doi.org/10.1016/j.jaad.2022.07.002>
- 548 27. Strober B, Thaçi D, Sofen H, et al (2022) Deucravacitinib versus placebo and apremilast  
549 in moderate to severe plaque psoriasis: efficacy and safety results from the 52-week, randomized,  
550 double-blinded, phase 3 POETYK PSO-2 trial. *J Am Acad Dermatol* 88(1):P40-51.  
551 <https://doi.org/10.1016/j.jaad.2022.08.061>
- 552 28. Bristol Myers Squibb. U.S. Food and Drug Administration Approves Sotyktu™  
553 (deucravacitinib), Oral Treatment for Adults with Moderate-to-Severe Plaque Psoriasis.  
554 [https://news.bms.com/news/details/2022/U.S.-Food-and-Drug-Administration-Approves-](https://news.bms.com/news/details/2022/U.S.-Food-and-Drug-Administration-Approves-Sotyktu-deucravacitinib-Oral-Treatment-for-Adults-with-Moderate-to-Severe-Plaque-Psoriasis/default.aspx)  
555 [Sotyktu-deucravacitinib-Oral-Treatment-for-Adults-with-Moderate-to-Severe-Plaque-](https://news.bms.com/news/details/2022/U.S.-Food-and-Drug-Administration-Approves-Sotyktu-deucravacitinib-Oral-Treatment-for-Adults-with-Moderate-to-Severe-Plaque-Psoriasis/default.aspx)  
556 [Psoriasis/default.aspx](https://news.bms.com/news/details/2022/U.S.-Food-and-Drug-Administration-Approves-Sotyktu-deucravacitinib-Oral-Treatment-for-Adults-with-Moderate-to-Severe-Plaque-Psoriasis/default.aspx). Accessed 27 Nov 2022
- 557 29. Ravassard P, Hazhouz Y, Pechberty S, et al (2011) A genetically engineered human  
558 pancreatic  $\beta$  cell line exhibiting glucose-inducible insulin secretion. *J Clin Invest* 121(9):3589–97.  
559 <https://doi.org/10.1172/JCI58447>
- 560 30. Brozzi F, Nardelli TR, Lopes M, et al (2015) Cytokines induce endoplasmic reticulum  
561 stress in human, rat and mouse beta cells via different mechanisms. *Diabetologia* 58(10):2307–  
562 2316. <https://doi.org/10.1007/s00125-015-3669-6>
- 563 31. Santin I, Moore F, Grieco FA, Marchetti P, Brancolini C, Eizirik DL (2012) USP18 is a  
564 key regulator of the interferon-driven gene network modulating pancreatic beta cell inflammation

- 565 and apoptosis. *Cell Death Dis* 3(11):e49. <https://doi.org/10.1038/cddis.2012.158>
- 566 32. Santin I, Dos Santos RS, Eizirik DL (2016) Pancreatic beta cell survival and signaling  
567 pathways: Effects of type 1 diabetes-associated genetic variants. In: *Methods in Molecular*  
568 *Biology*. Humana Press, New York, NY, USA, pp 21–54
- 569 33. Dhayal S, Leslie KA, Baity M, et al (2022) Temporal regulation of interferon signalling in  
570 human EndoC- $\beta$ H1 cells. *J Mol Endocrinol* 69(2):299–313. <https://doi.org/10.1530/JME-21-0224>
- 571 34. Villar-Pazos S, Martinez-Pinna J, Castellano-Muñoz M, et al (2017) Molecular  
572 mechanisms involved in the non-monotonic effect of bisphenol-A on Ca<sup>2+</sup> entry in mouse  
573 pancreatic  $\beta$ -cells. *Sci Rep* 7(1):11770. <https://doi.org/10.1038/s41598-017-11995-3>
- 574 35. Dos Santos RS, Medina-Gali RM, Babiloni-Chust I, Marroqui L, Nadal A (2022) In Vitro  
575 Assays to Identify Metabolism-Disrupting Chemicals with Diabetogenic Activity in a Human  
576 Pancreatic  $\beta$ -Cell Model. *Int J Mol Sci* 23(9):5040. <https://doi.org/10.3390/ijms23095040>
- 577 36. Colli ML, Hill JLE, Marroquí L, et al (2018) PDL1 is expressed in the islets of people with  
578 type 1 diabetes and is up-regulated by interferons- $\alpha$  and- $\gamma$  via IRF1 induction. *EBioMedicine*  
579 36:367–375. <https://doi.org/10.1016/j.ebiom.2018.09.040>
- 580 37. Colli ML, Szymczak F, Eizirik DL (2020) Molecular Footprints of the Immune Assault on  
581 Pancreatic Beta Cells in Type 1 Diabetes. *Front Endocrinol* 11:666.  
582 <https://doi.org/10.3389/fendo.2020.568446>
- 583 38. Dogusan Z, Garcia M, Flamez D, et al (2008) Double-stranded RNA induces pancreatic  $\beta$ -  
584 cell apoptosis by activation of the toll-like receptor 3 and interferon regulatory factor 3 pathways.  
585 *Diabetes* 57(5):1236–1245. <https://doi.org/10.2337/db07-0844>
- 586 39. Dos Santos RS, Marroqui L, Velayos T, et al (2019) DEXI, a candidate gene for type 1  
587 diabetes, modulates rat and human pancreatic beta cell inflammation via regulation of the type I  
588 IFN/STAT signalling pathway. *Diabetologia* 62(3):459–472. [https://doi.org/10.1007/s00125-018-](https://doi.org/10.1007/s00125-018-4782-0)  
589 4782-0
- 590 40. Stewart TA (2003) Neutralizing interferon alpha as a therapeutic approach to autoimmune  
591 diseases. *Cytokine Growth Factor Rev* 14(2):139–154. [https://doi.org/10.1016/S1359-](https://doi.org/10.1016/S1359-6101(02)00088-6)  
592 6101(02)00088-6
- 593 41. Stewart T, Hultgren B, Huang X, Pitts-Meek S, Hully J, MacLachlan N (1993) Induction  
594 of type I diabetes by interferon-alpha in transgenic mice. *Science* 260(5116):1942–1946.  
595 <https://doi.org/10.1126/science.8100367>
- 596 42. Li Q, Xu B, Michie SA, Rubins KH, Schreiber RD, McDevitt HO (2008) Interferon- $\alpha$   
597 initiates type 1 diabetes in nonobese diabetic mice. *Proc Natl Acad Sci U S A* 105(34):12439–  
598 12444. <https://doi.org/10.1073/pnas.0806439105>
- 599 43. Marro BS, Ware BC, Zak J, De La Torre JC, Rosen H, Oldstone MBA (2017) Progression  
600 of type 1 diabetes from the prediabetic stage is controlled by interferon- $\alpha$  signaling. *Proc Natl*  
601 *Acad Sci U S A* 114(14):3708–3713. <https://doi.org/10.1073/pnas.1700878114>
- 602 44. Wallace DJ, Furie RA, Tanaka Y, et al (2018) Baricitinib for systemic lupus erythematosus:  
603 a double-blind, randomised, placebo-controlled, phase 2 trial. *The Lancet* 392(10143):222–231.  
604 [https://doi.org/10.1016/S0140-6736\(18\)31363-1](https://doi.org/10.1016/S0140-6736(18)31363-1)
- 605 45. Taylor PC, Keystone EC, Van Der Heijde D, et al (2017) Baricitinib versus Placebo or  
606 Adalimumab in Rheumatoid Arthritis. *N Engl J Med* 376(652–662).  
607 <https://doi.org/10.1056/NEJMoa1608345>
- 608 46. Waibel M, Thomas HE, Wentworth JM, et al (2022) Investigating the efficacy of baricitinib  
609 in new onset type 1 diabetes mellitus (BANDIT)—study protocol for a phase 2, randomized,  
610 placebo controlled trial. *Trials* 23(1):433. <https://doi.org/10.1186/s13063-022-06356-z>

- 611 47. Wroblewski ST, Moslin R, Lin S, et al (2019) Highly Selective Inhibition of Tyrosine Kinase  
612 2 (TYK2) for the Treatment of Autoimmune Diseases: Discovery of the Allosteric Inhibitor BMS-  
613 986165. *J Med Chem* 62(20):8973–8995. <https://doi.org/10.1021/acs.jmedchem.9b00444>
- 614 48. Zhou Y, Li X, Shen R, et al (2022) Novel Small Molecule Tyrosine Kinase 2 Pseudokinase  
615 Ligands Block Cytokine-Induced TYK2-Mediated Signaling Pathways. *Front Immunol* 13
- 616 49. Minegishi Y, Saito M, Morio T, et al (2006) Human Tyrosine Kinase 2 Deficiency Reveals  
617 Its Requisite Roles in Multiple Cytokine Signals Involved in Innate and Acquired Immunity.  
618 *Immunity* 25:745–755. <https://doi.org/10.1016/j.immuni.2006.09.009>

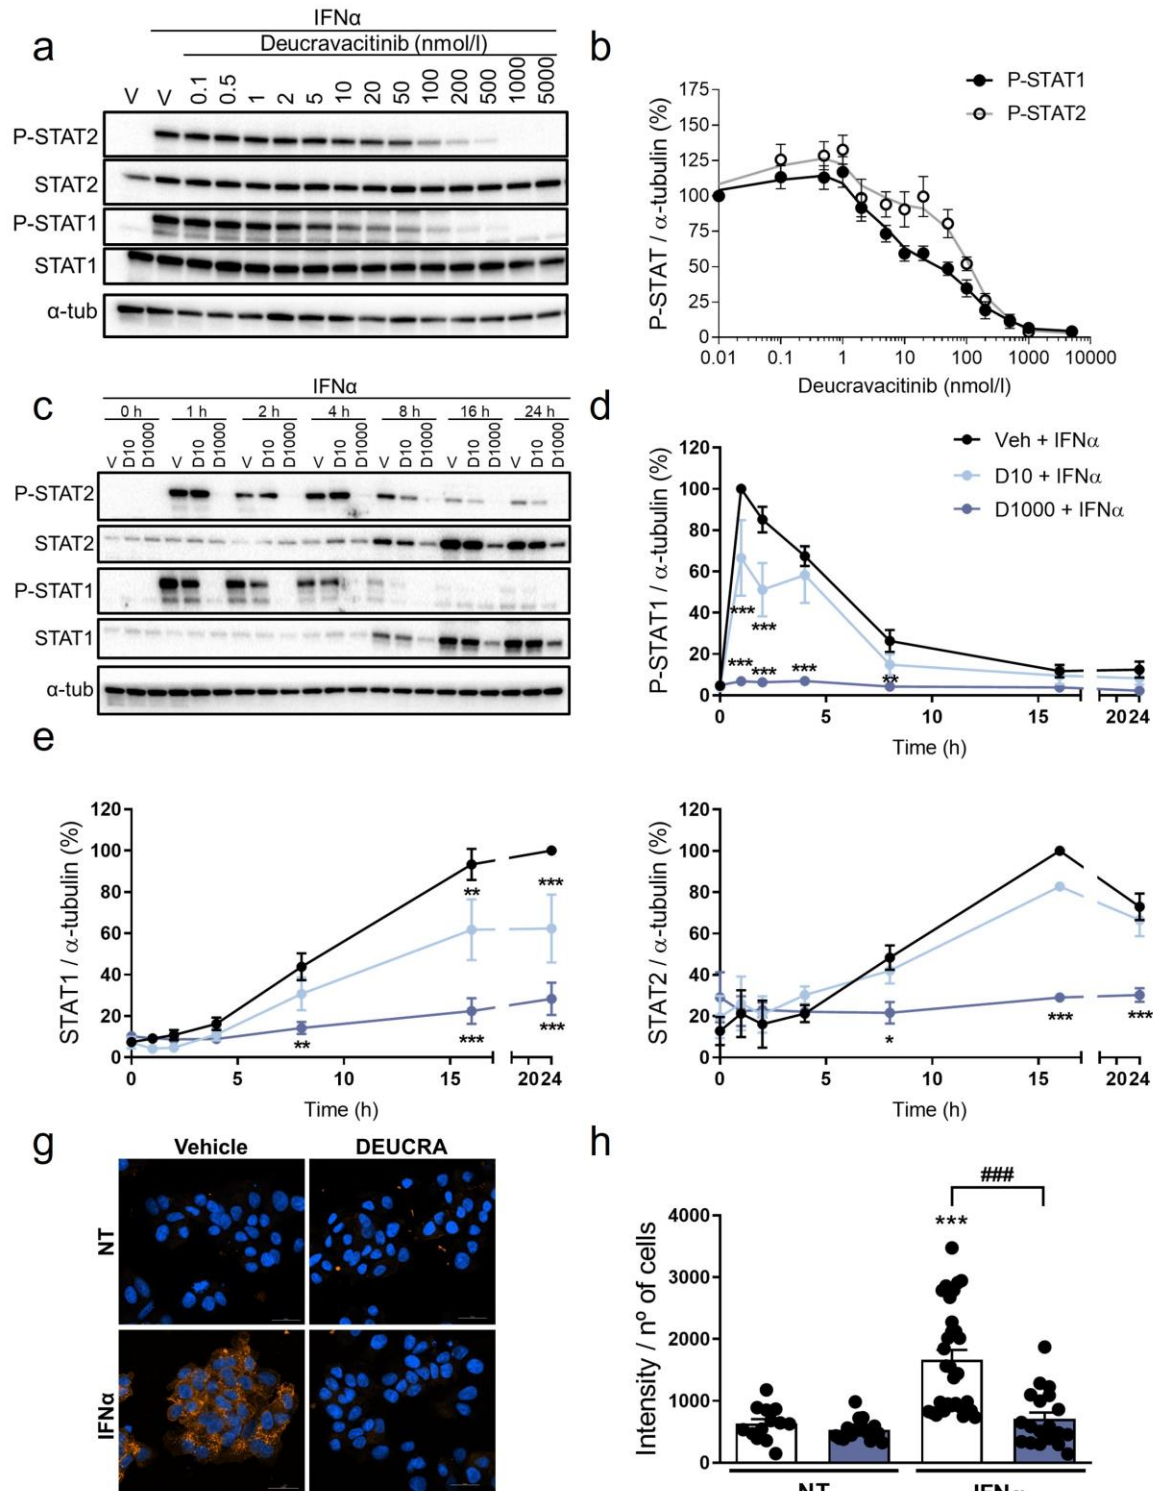

619 **Figure 1. Deucravacitinib inhibits IFN $\alpha$ -mediated STAT phosphorylation and MHC class I**  
 620 **overexpression.** (a,b) EndoC- $\beta$ H1 cells were treated with vehicle (V) or pre-treated with the  
 621 indicated deucravacitinib concentrations for 1 h. Afterwards, cells were left untreated or treated  
 622 with IFN $\alpha$  (1000 U/ml) in the absence or presence of deucravacitinib for 1 h. (a, b) Protein

623 expression was measured by western blot. **(a)** Images are representative of four to six independent  
624 experiments. **(b)** Densitometry results are shown for P-STAT1 (black circles) and P-STAT2 (white  
625 circles). Values were normalised to  $\alpha$ -tubulin, and then to the value of IFN $\alpha$  alone of each  
626 experiment (considered as 100%). **(c-h)** EndoC- $\beta$ H1 cells were treated with vehicle (V or Veh,  
627 black circles) or pre-treated with deucravacitinib (10 [D10, soft blue circles] and 1000 nmol/l  
628 [D1000, dark blue circles]) for 1 h. Afterwards, cells were left untreated or treated with IFN $\alpha$  (1000  
629 U/ml) in the absence or presence of deucravacitinib for 1–24 h **(c-f)** or 24 h **(g, h)**. **(c-f)** Protein  
630 expression was measured by western blot. **(c)** Images are representative of three to six independent  
631 experiments. **(d-f)** Densitometry results are shown for P-STAT1 **(d)**, STAT1 **(e)**, and STAT2 **(f)**.  
632 Values were normalised to  $\alpha$ -tubulin, and then to the highest value of each experiment (considered  
633 as 1). **(g, h)** Immunocytochemistry analysis of MHC class I (red) and Hoechst 33342 (blue) upon  
634 exposure to IFN $\alpha$  in the absence (white bars) or presence of 1000 nmol/l deucravacitinib (dark  
635 blue bars) for 24 h. Representative images of three independent experiments (13–30  
636 images/cover slip) **(g)** and quantification **(h)** are shown. Data are means  $\pm$  SEM of three to six  
637 independent experiments. **(d-f)** \* $p \leq 0.05$ , \*\* $p \leq 0.01$  and \*\*\* $p \leq 0.001$  vs Vehicle + IFN $\alpha$  (two-way  
638 ANOVA plus Dunnett's test). **(h)** \*\*\* $p < 0.001$  vs the respective untreated (NT) (two-way ANOVA  
639 plus Sidak's test); ### $p \leq 0.001$ , as indicated by bars (two-way ANOVA plus Dunnett's test).

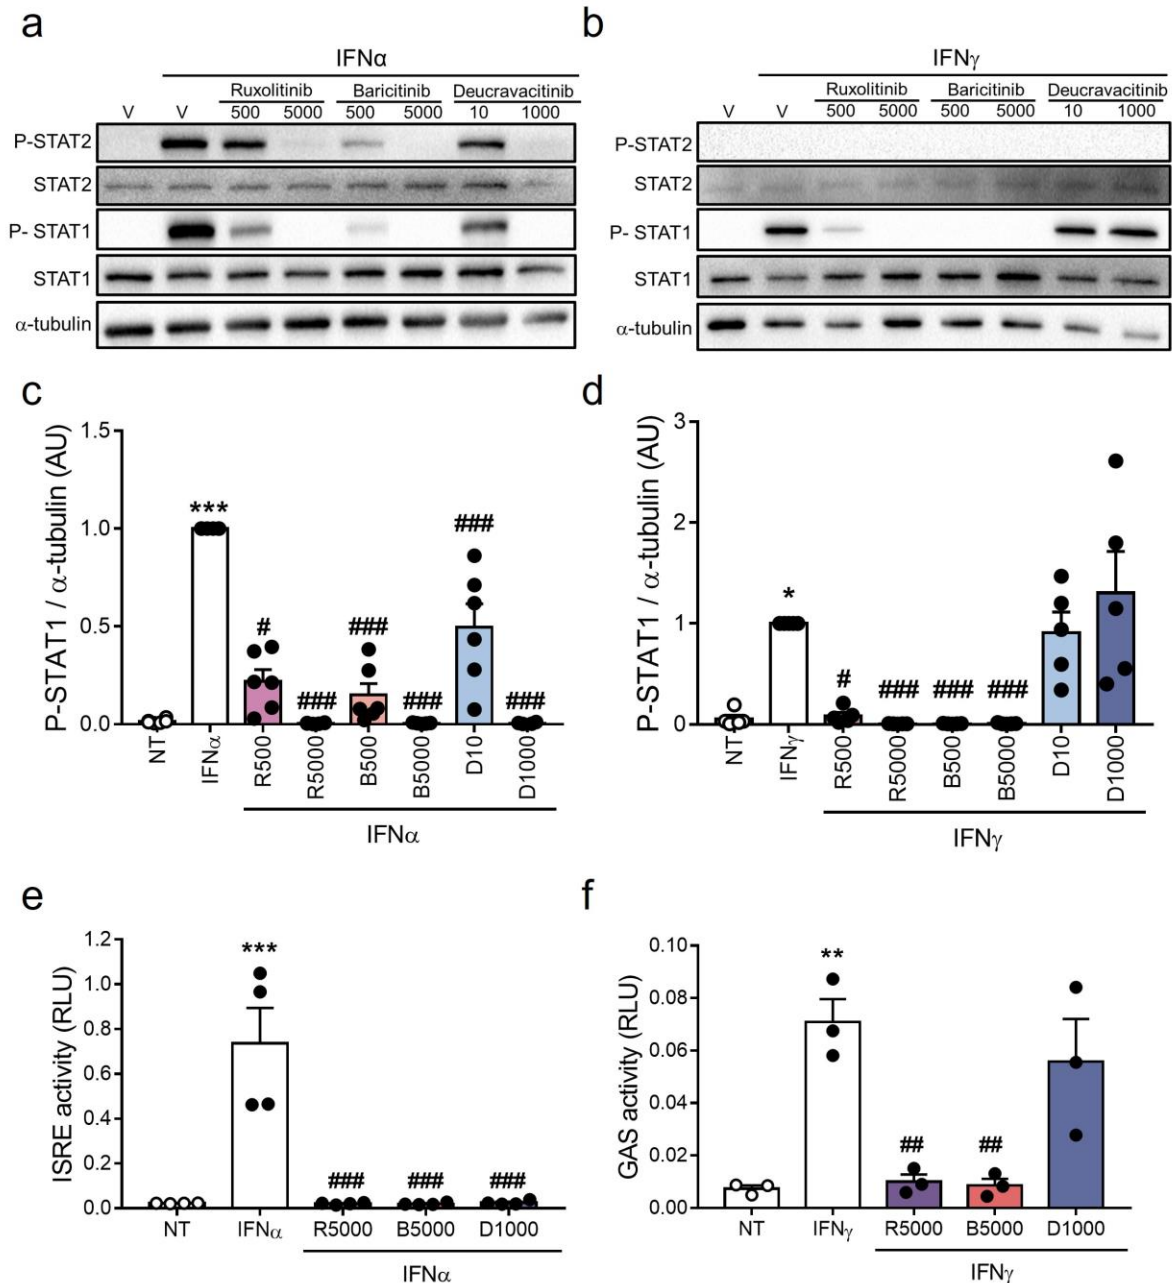

640 **Figure 2. Deucravacitinib blocks IFN $\alpha$ - but not IFN $\gamma$ -induced pathway.** (a-d) EndoC- $\beta$ H1  
 641 cells were treated with vehicle (V, white bars) or pre-treated with ruxolitinib (500 and 5000 nmol/l;  
 642 R500 and R5000), baricitinib (500 and 5000 nmol/l; B500 and B5000), or deucravacitinib (10 and  
 643 1000 nmol/l; D10 and D1000) for 1 h. Afterwards, cells were left untreated (NT, white circles) or  
 644 treated with either IFN $\alpha$  (1000 U/ml) (a, c) or IFN $\gamma$  (1000 U/ml) (b, d) in the absence or presence  
 645 of each inhibitor for 1 h. (a-d) Protein expression was measured by western blot. (a, b) Images are  
 646 representative of five to six independent experiments. (c, d) Densitometry results are shown for P-

647 STAT1. Values were normalised to  $\alpha$ -tubulin, and then to the value of IFN $\alpha$  (**c**) or IFN $\gamma$  alone (**d**)  
648 of each experiment (considered as 1). (**e**, **f**) EndoC- $\beta$ H1 cells were transfected with a pRL-CMV  
649 plasmid (used as internal control) plus either ISRE (**e**) or GAS (**f**) promoter reporter constructs.  
650 After 48 h of recovery, cells were treated with vehicle (white bars) or pre-treated with ruxolitinib  
651 (5000 nmol/l; R5000), baricitinib (5000 nmol/l; B5000), or deucravacitinib (1000 nmol/l; D1000)  
652 for 1 h. Afterwards, cells were left untreated (NT, white circles) or treated with either IFN $\alpha$  (1000  
653 U/ml) for 2 h (**e**) or IFN $\gamma$  (1000 U/ml) for 24 h (**f**) in the absence or presence of each inhibitor.  
654 Relative luciferase units (RLU) were measured by a luminescent assay. Data are means  $\pm$  SEM of  
655 three to six independent experiments. \* $p \leq 0.05$ , \*\* $p \leq 0.01$  and \*\*\* $p \leq 0.001$  vs the respective  
656 untreated (NT) (one-way ANOVA plus Dunnett's test). # $p \leq 0.05$ , ## $p \leq 0.01$  and ### $p \leq 0.001$  vs IFN $\alpha$   
657 (**c**, **e**) or IFN $\gamma$  (**d**, **f**) (one-way ANOVA plus Dunnett's test).



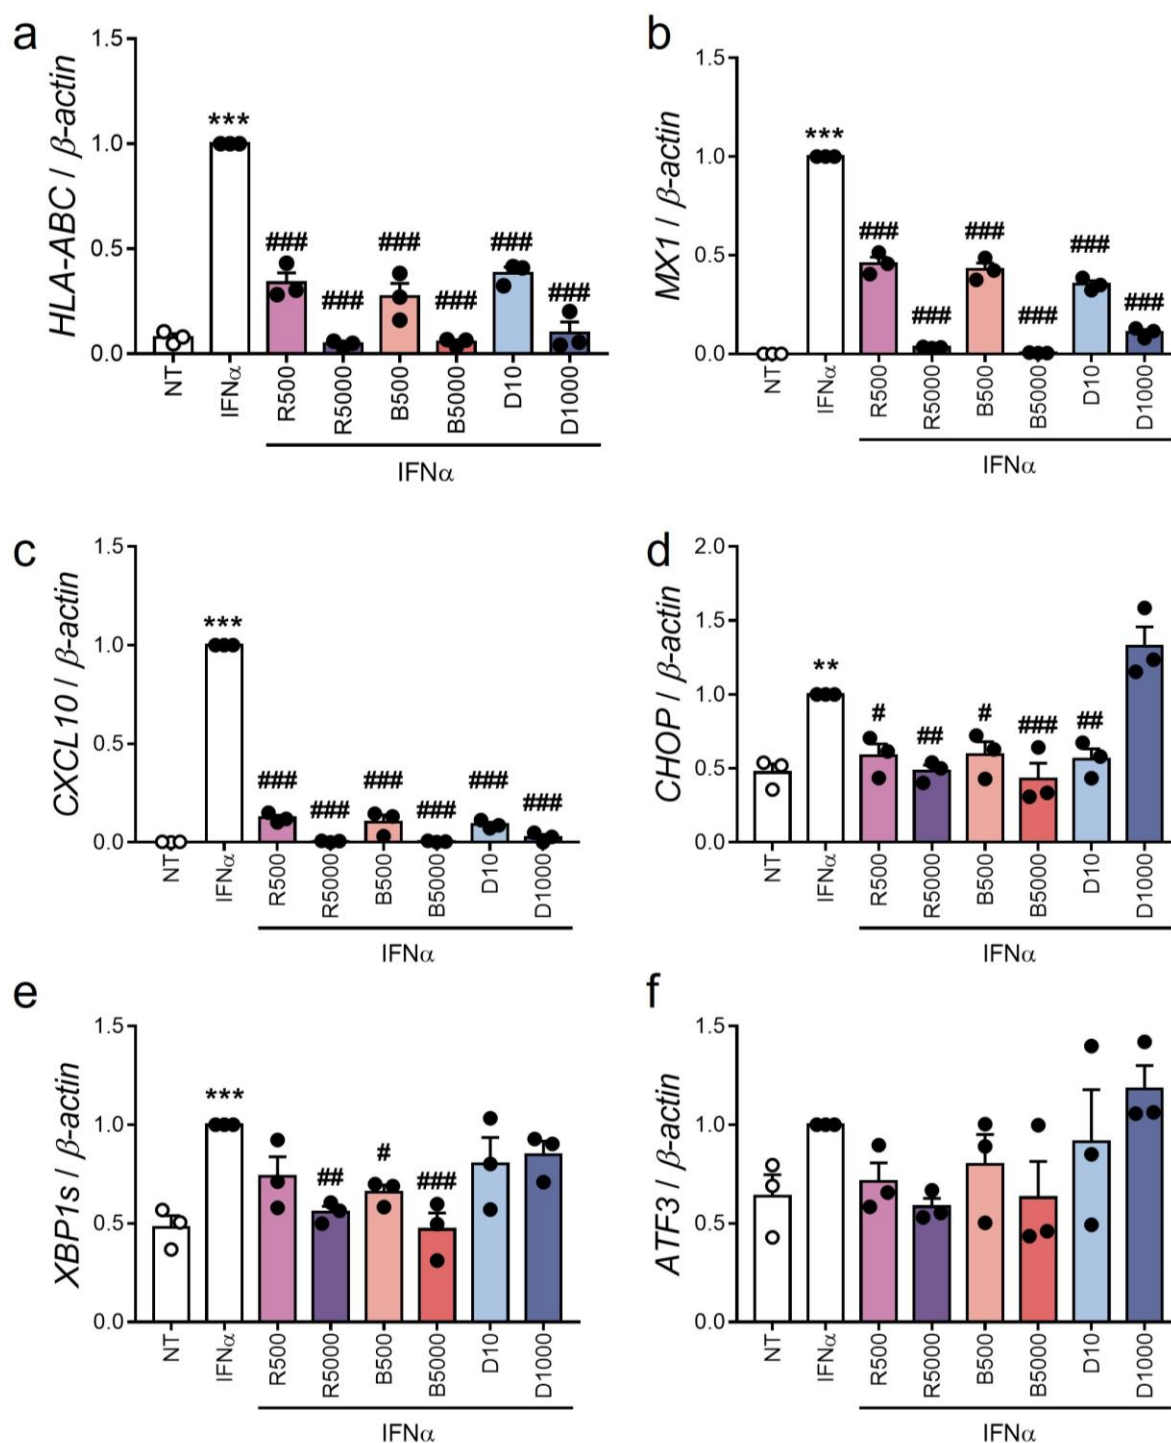

658 **Figure 3. Deucravacitinib abrogates IFN $\alpha$ -induced expression of ISGs but not ER stress**  
 659 **markers.** (a-f) EndoC- $\beta$ H1 cells were treated with vehicle (white bars) or pre-treated with  
 660 ruxolitinib (500 and 5000 nmol/l; R500 and R5000), baricitinib (500 and 5000 nmol/l; B500 and  
 661 B5000), or deucravacitinib (10 and 1000 nmol/l; D10 and D1000) for 1 h. Afterwards, cells were

662 left untreated (NT) or treated with IFN $\alpha$  (1000 U/ml) in the absence or presence of each inhibitor  
663 for 24 h. mRNA expression of *HLA-ABC* (**a**), *MX1* (**b**), *CXCL10* (**c**), *CHOP* (**d**), *XBPIs* (**e**), and  
664 *ATF3* (**f**) was analysed by real-time PCR, normalised to  $\beta$ -actin and then to the value of IFN $\alpha$  alone  
665 of each experiment (considered as 1). Data are means  $\pm$  SEM of three independent experiments.  
666 \*\* $p \leq 0.01$  and \*\*\* $p \leq 0.001$  vs the respective untreated (NT) (one-way ANOVA plus Dunnett's  
667 test). # $p \leq 0.05$ , ## $p \leq 0.01$  and ### $p \leq 0.001$  vs IFN $\alpha$  (one-way ANOVA plus Dunnett's test).

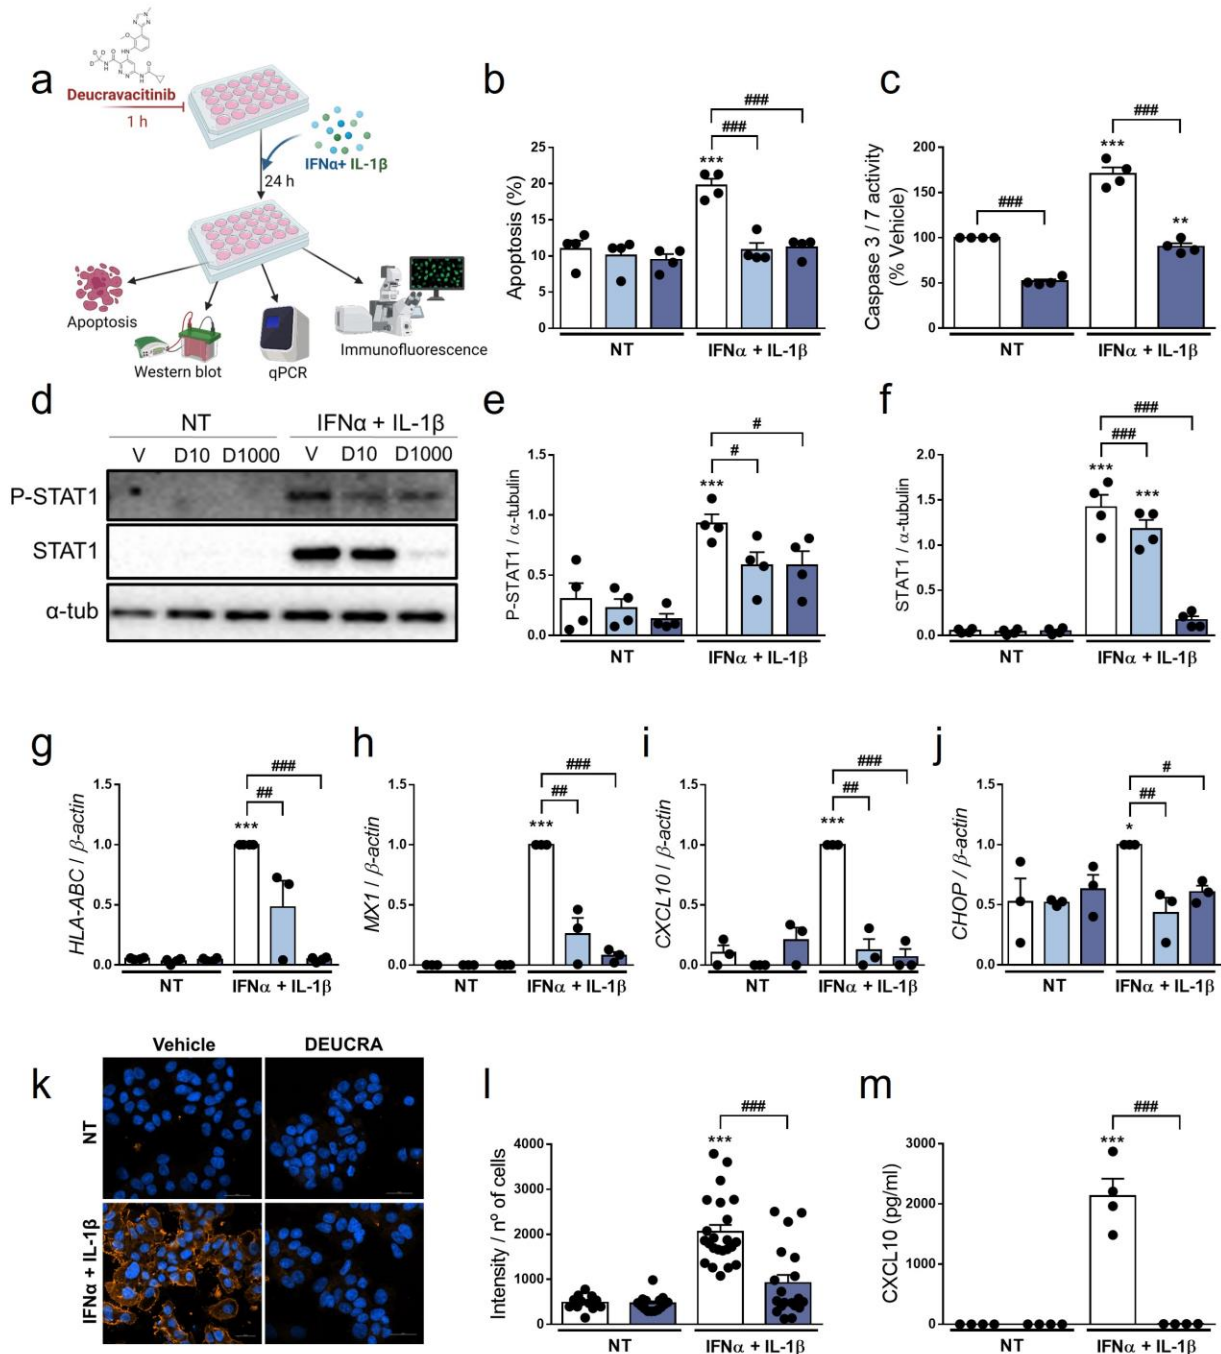

668 **Figure 4. Pre-treatment with deucravacitinib prevents IFN $\alpha$  + IL-1 $\beta$  effects.** (a) Experimental  
 669 design of the pre-treatment with deucravacitinib and subsequent exposure to IFN $\alpha$  + IL-1 $\beta$  for 24  
 670 h. EndoC- $\beta$ H1 cells were treated with vehicle (V, white bars) or pre-treated with deucravacitinib  
 671 (10 [D10, soft blue bars] and 1000 nmol/l [D1000, dark blue bars]) for 1 h. Afterwards, cells were  
 672 left untreated (NT) or treated with IFN $\alpha$  + IL-1 $\beta$  (1000 U/ml + 50 U/ml, respectively) in the  
 673 absence or presence of deucravacitinib for 24 h. (b) Apoptosis was evaluated using Hoechst

674 33342/propidium iodide staining. **(c)** Caspase 3/7 activity was measured by a luminescent assay.  
675 Results are expressed as % vehicle-treated cells in the absence of cytokines (NT). **(d-f)** Protein  
676 expression was measured by western blot. **(d)** Images are representative of four independent  
677 experiments. Densitometry results are shown for P-STAT1 **(e)** and P-STAT2 **(f)**. Values were  
678 normalised to  $\alpha$ -tubulin. **(g-j)** mRNA expression of *HLA-ABC* **(g)**, *CXCL10* **(h)**, *MX1* **(i)**, and  
679 *CHOP* **(j)** was analysed by real-time PCR, normalised to  $\beta$ -actin and then to the value of Vehicle  
680 treated with IFN $\alpha$  + IL-1 $\beta$  (considered as 1). **(k, l)** Immunocytochemistry analysis of MHC class  
681 I (red) and Hoechst 33342 (blue) upon exposure to IFN $\alpha$  + IL-1 $\beta$  in the absence (white bars) or  
682 presence of deucravacitinib (dark blue bars) for 24 h. Representative images of three independent  
683 experiments (12–23 images/coverslip) **(k)** and quantification **(l)** are shown. **(m)** CXCL10 secreted  
684 to the medium was determined by ELISA. Data are means  $\pm$  SEM of three to four independent  
685 experiments. \*\* $p \leq 0.01$  and \*\*\* $p \leq 0.001$  vs the respective untreated (NT) (two-way ANOVA plus  
686 Sidak's test). # $p \leq 0.05$ , ## $p \leq 0.01$  and ### $p \leq 0.001$ , as indicated by bars (two-way ANOVA plus  
687 Dunnett's test).

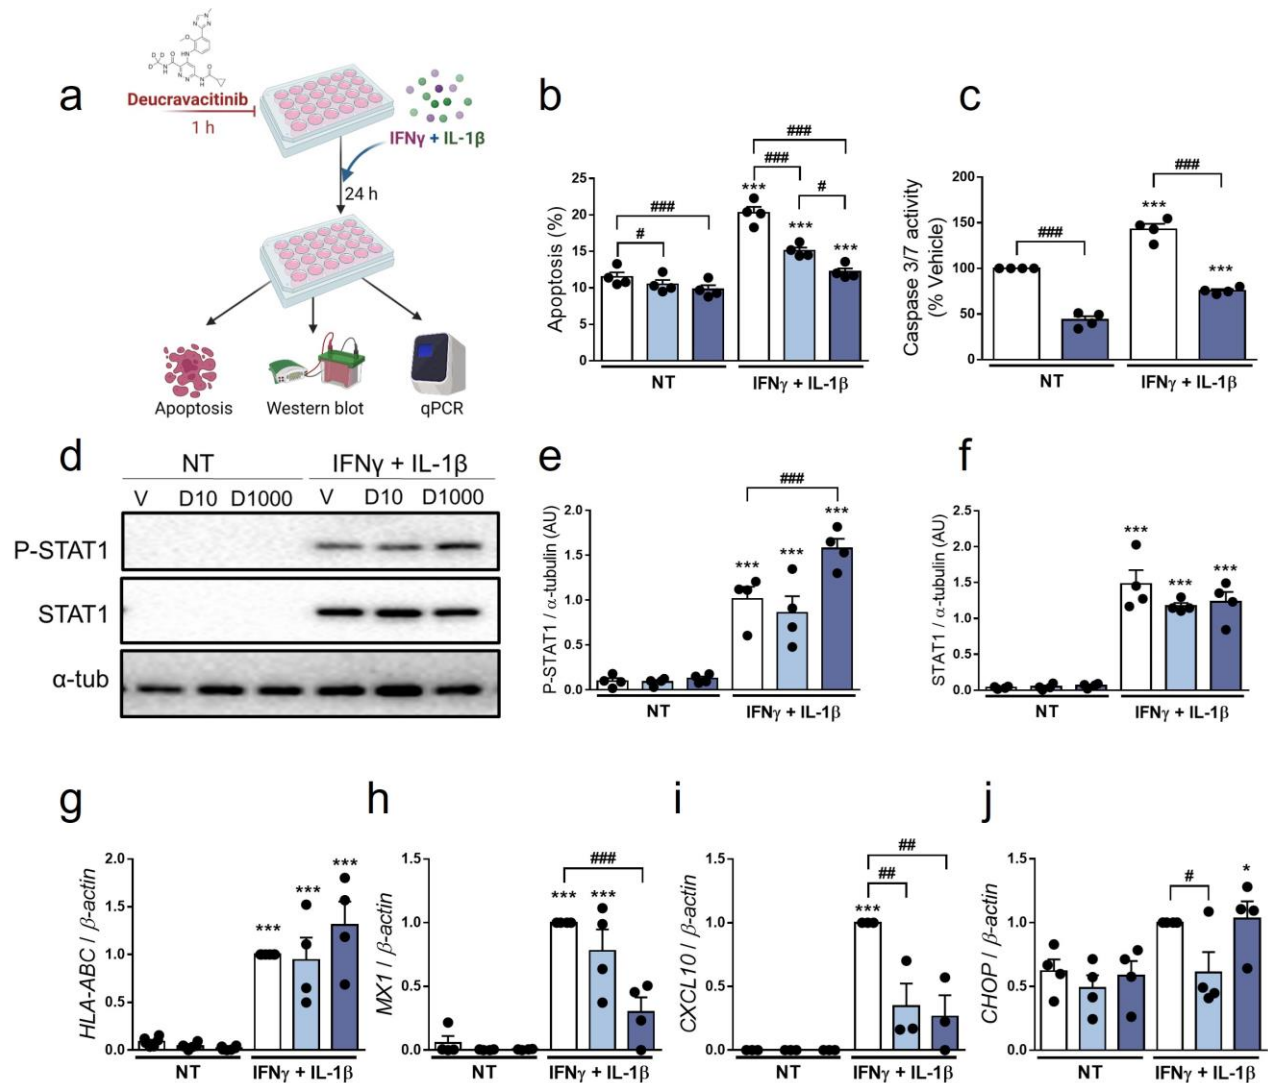

688 **Figure 5. Pre-treatment with deucravacitinib prevents IFN $\gamma$  + IL-1 $\beta$  effects.** (a) Experimental  
 689 design of the pre-treatment with deucravacitinib and subsequent exposure to IFN $\gamma$  + IL-1 $\beta$  for 24  
 690 h. EndoC- $\beta$ H1 cells were treated with vehicle (V, white bars) or pre-treated with deucravacitinib  
 691 (10 [D10, soft blue bars] and 1000 nmol/l [D1000, dark blue bars]) for 1 h. Afterwards, cells were  
 692 left untreated (NT) or treated with IFN $\gamma$  + IL-1 $\beta$  (1000 U/ml + 50 U/ml, respectively) in the  
 693 absence or presence of deucravacitinib for 24 h. (b) Apoptosis was evaluated using Hoechst  
 694 33342/propidium iodide staining. (c) Caspase 3/7 activity was measured by a luminescent assay.  
 695 Results are expressed as % vehicle-treated cells in the absence of cytokines (NT). (d-f) Protein  
 696 expression was measured by western blot. Images are representative of four independent  
 697 experiments (d). Densitometry results are shown for P-STAT1 (e) and P-STAT2 (f). Values were  
 698 normalised to  $\alpha$ -tubulin. (g-j) mRNA expression of *HLA-ABC* (g), *CXCL10* (h), *MX1* (i), and

699 *CHOP* (j) was analysed by real-time PCR, normalised to  $\beta$ -actin and then to the value of Vehicle  
700 treated with IFN $\gamma$  + IL-1 $\beta$  (considered as 1). Data are means  $\pm$  SEM of three to four independent  
701 experiments. \* $p \leq 0.05$ , \*\* $p \leq 0.01$  and \*\*\* $p \leq 0.001$  vs the respective untreated (NT) (two-way  
702 ANOVA plus Sidak's test). # $p \leq 0.05$ , ## $p \leq 0.01$  and ### $p \leq 0.001$ , as indicated by bars (two-way  
703 ANOVA plus Dunnett's test).

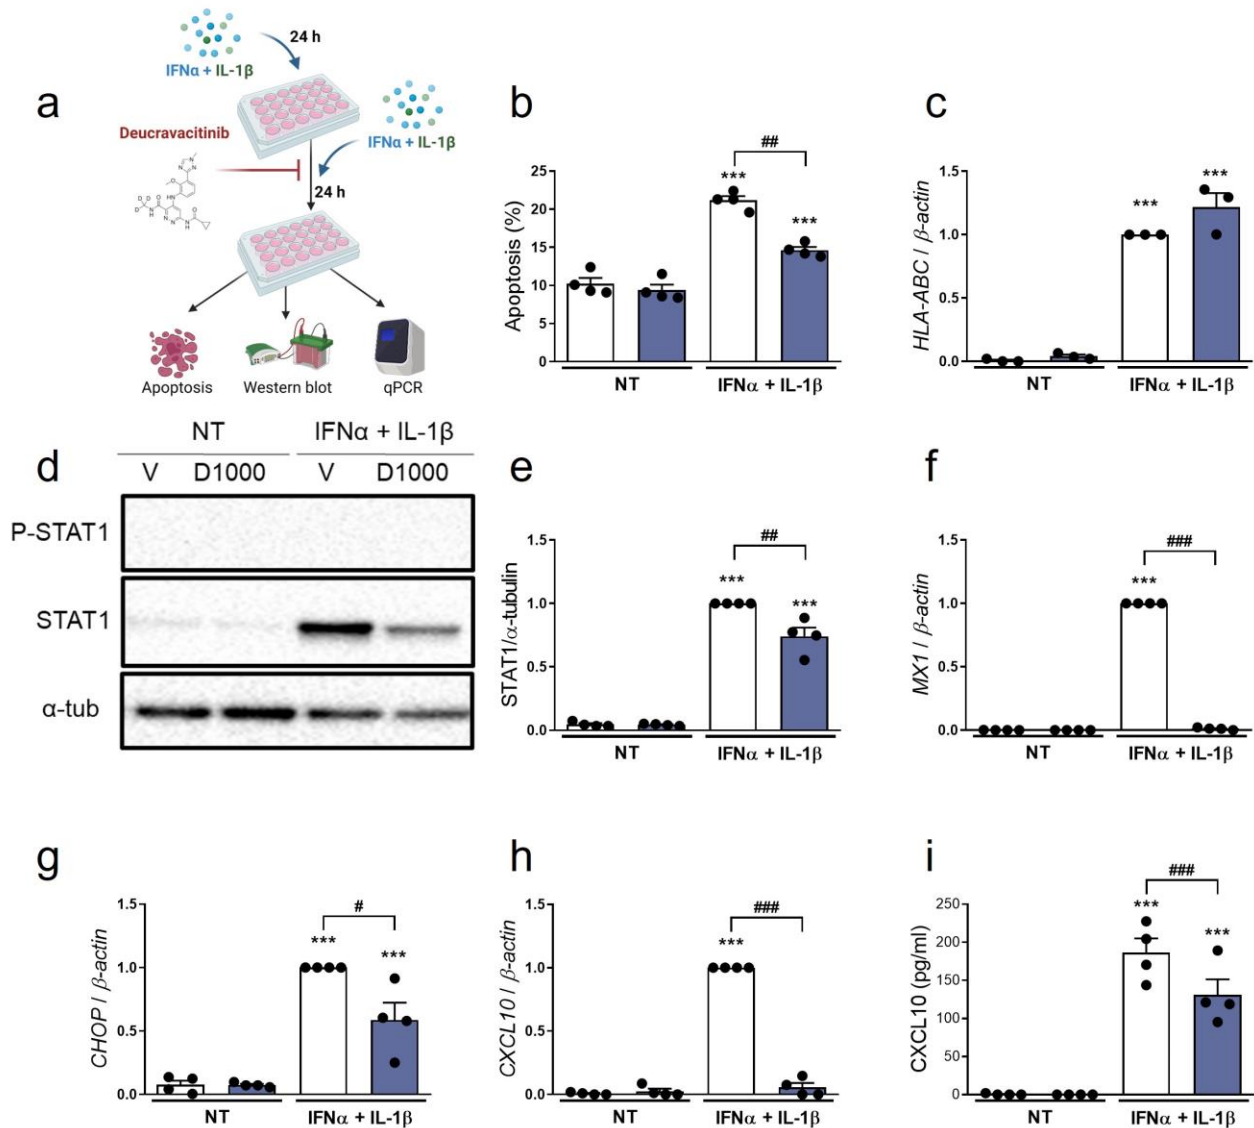

704 **Figure 6. Treatment with deucravacitinib partially reverts IFN $\alpha$  + IL-1 $\beta$ -induced changes.**  
 705 (a) Experimental design of the pre-treatment with IFN $\alpha$  + IL-1 $\beta$  and subsequent exposure to IFN $\alpha$   
 706 + IL-1 $\beta$  in the presence of deucravacitinib for 24 h. EndoC- $\beta$ H1 cells were left untreated (NT) or  
 707 pre-treated with IFN $\alpha$  + IL-1 $\beta$  (1000 U/ml + 50 U/ml, respectively) for 24 h. Afterwards, cells  
 708 were treated with vehicle (V, white bars) or 1000 nmol/l deucravacitinib (D1000, dark blue bars)  
 709 in the absence (NT) or presence of IFN $\alpha$  + IL-1 $\beta$  for 24 h. (b) Apoptosis was evaluated using  
 710 Hoechst 33342/propidium iodide staining. (c, f-h) mRNA expression of *HLA-ABC* (c), *MX1* (f),  
 711 *CHOP* (g), and *CXCL10* (h) was analysed by real-time PCR, normalised to  $\beta$ -actin and then to the  
 712 value of Vehicle treated with IFN $\alpha$  + IL-1 $\beta$  (considered as 1). (d, e) Protein expression was  
 713 measured by western blot. (d) Images are representative of four independent experiments. (e)

714 Densitometry results are shown for STAT1. Values were normalised to  $\alpha$ -tubulin. (i) CXCL10  
715 secreted to the medium was determined by ELISA. Data are means  $\pm$  SEM of three to four  
716 independent experiments. \*\* $p \leq 0.01$  and \*\*\* $p \leq 0.001$  vs the respective untreated (NT) (two-way  
717 ANOVA plus Sidak's test). # $p \leq 0.05$ , ## $p \leq 0.01$  and ### $p \leq 0.001$ , as indicated by bars (two-way  
718 ANOVA plus Dunnett's test).



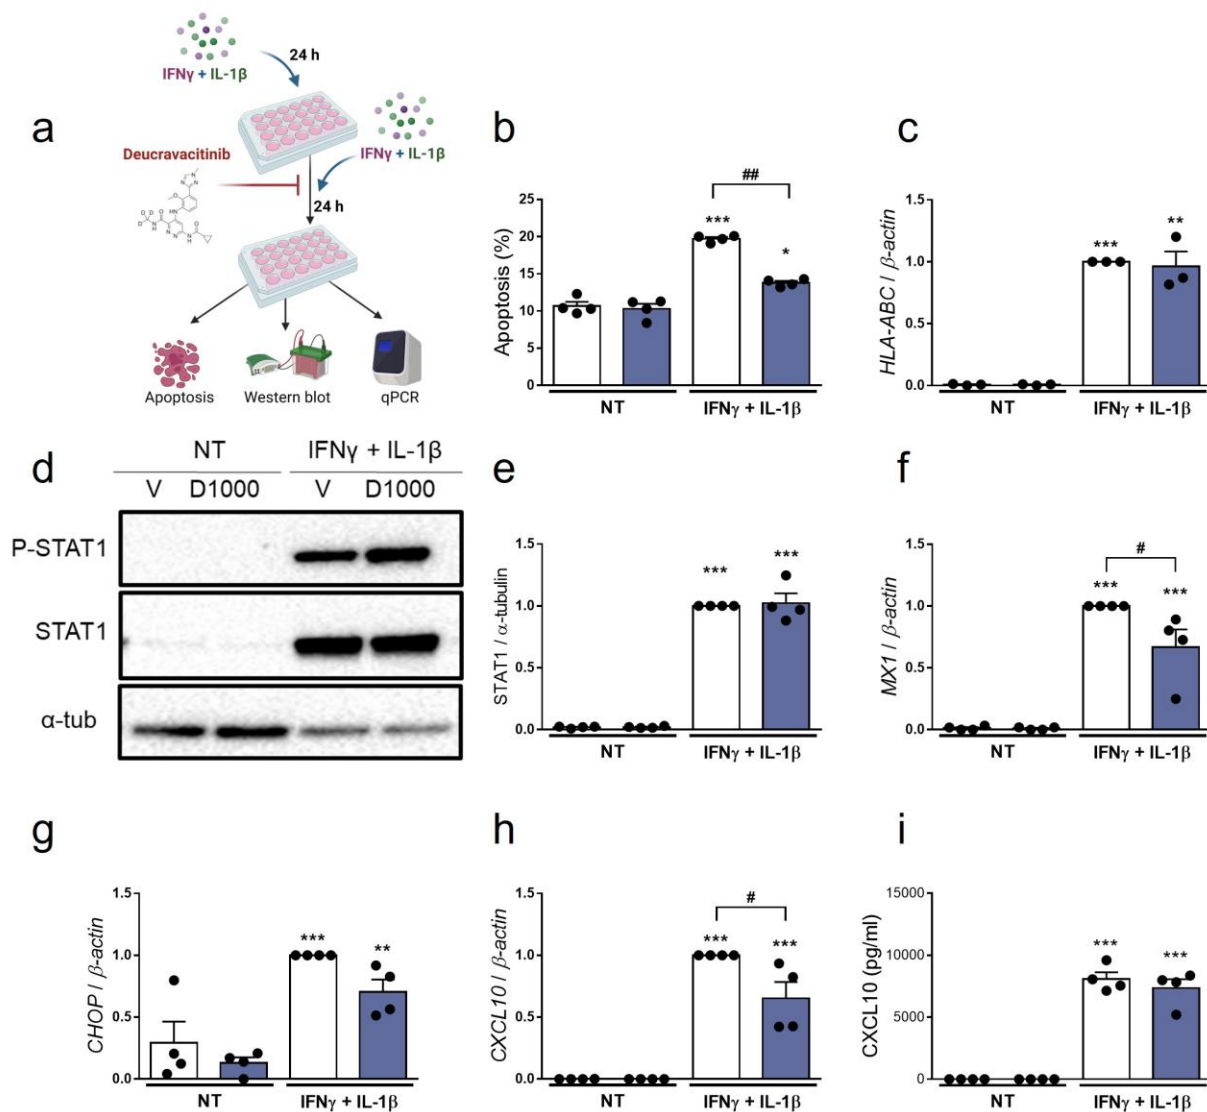

719 **Figure 7. Treatment with deucravacitinib partially reverts IFN $\gamma$  + IL-1 $\beta$ -induced changes.**

720 **(a)** Experimental design of the pre-treatment with IFN $\gamma$  + IL-1 $\beta$  and subsequent exposure to IFN $\gamma$   
 721 + IL-1 $\beta$  in the presence of deucravacitinib for 24 h. EndoC- $\beta$ H1 cells were left untreated (NT) or  
 722 pre-treated with IFN $\gamma$  + IL-1 $\beta$  (1000 U/ml + 50 U/ml, respectively) for 24 h. Afterwards, cells  
 723 were treated with vehicle (V, white bars) or 1000 nmol/l deucravacitinib (D1000, dark blue bars)  
 724 in the absence (NT) or presence of IFN $\gamma$  + IL-1 $\beta$  for 24 h. **(b)** Apoptosis was evaluated using  
 725 Hoechst 33342/propidium iodide staining. **(c, f-h)** mRNA expression of *HLA-ABC* **(c)**, *MX1* **(f)**,  
 726 *CHOP* **(g)**, and *CXCL10* **(h)** was analysed by real-time PCR, normalised to  $\beta$ -actin and then to the  
 727 value of Vehicle treated with IFN $\gamma$  + IL-1 $\beta$  (considered as 1). **(d, e)** Protein expression was  
 728 measured by western blot. **(d)** Images are representative of four independent experiments. **(e)**

729 Densitometry results are shown for STAT1. Values were normalised to  $\alpha$ -tubulin. (i) CXCL10  
730 secreted to the medium was determined by ELISA. Data are means  $\pm$  SEM of three to four  
731 independent experiments. \* $p \leq 0.05$ , \*\* $p \leq 0.01$  and \*\*\* $p \leq 0.001$  vs the respective untreated (NT)  
732 (two-way ANOVA plus Sidak's test). # $p \leq 0.05$  and ## $p \leq 0.01$ , as indicated by bars (two-way  
733 ANOVA plus Dunnett's test).
